# Supplementary material
Source: Elsevier journal article supplement (https://www.sciencedirect.com/science/article/pii/S0300893225012205)
Supplement: mmc1 [file mmc1.pdf]

## SUPPLEMENTARY DATA

**Table 1 of the supplementary data.** Search strategy

| Pubmed    |                                                                                                                                                                                                                                        |               | EMBASE    |                                                                                                                                                                       |                | Cochrane Library |                                                                                                                                                                                      |                |
|-----------|----------------------------------------------------------------------------------------------------------------------------------------------------------------------------------------------------------------------------------------|---------------|-----------|-----------------------------------------------------------------------------------------------------------------------------------------------------------------------|----------------|------------------|--------------------------------------------------------------------------------------------------------------------------------------------------------------------------------------|----------------|
| <b>#1</b> | "sglt 2 inhibitor"[Title] OR<br>"sodium glucose co-transporter<br>2 inhibitor"[Title] OR<br>"dapagliflozin"[Title] OR<br>"empagliflozin"[Title] OR<br>"sotagliflozin"[Title] OR<br>"canagliflozin"[Title] OR<br>"ertugliflozin"[Title] | <b>4400</b>   | <b>#1</b> | 'sglt-2 inhibitor' OR 'sodium<br>glucose co-transporter-2<br>inhibitor' OR dapagliflozin OR<br>empagliflozin OR sotagliflozin OR<br>canagliflozin OR ertugliflozin:ti | <b>19407</b>   | <b>#1</b>        | 'sglt-2 inhibitor' OR 'sodium<br>glucose co-transporter-2<br>inhibitor' OR dapagliflozin OR<br>empagliflozin OR sotagliflozin OR<br>canagliflozin OR ertugliflozin<br>[Record Title] | <b>4293</b>    |
| <b>#2</b> | "heart failure"[Title]                                                                                                                                                                                                                 | <b>92347</b>  | <b>#2</b> | 'heart failure':ti                                                                                                                                                    | <b>147222</b>  | <b>#2</b>        | 'heart failure' [Record Title]                                                                                                                                                       | <b>17977</b>   |
| <b>#3</b> | "randomized clinical<br>trial"[Title/Abstract] OR<br>"randomized controlled<br>trial"[Title/Abstract] OR<br>"randomized"[Title/Abstract]                                                                                               | <b>711793</b> | <b>#3</b> | 'randomized clinical trial' OR<br>'randomized controlled trial' OR<br>'randomized':ti,ab                                                                              | <b>1493489</b> | <b>#3</b>        | 'randomized clinical trial' OR<br>'randomized controlled trial' OR<br>'randomized' [Title Abstract<br>Keyword]                                                                       | <b>1166542</b> |
| <b>#4</b> | clinicaltrial[Filter] OR<br>randomized controlled<br>trial[Filter]                                                                                                                                                                     | <b>997384</b> | <b>#4</b> | (([controlled clinical trial]/lim OR<br>[randomized controlled<br>trial]/lim) AND ([article]/lim OR<br>[article in press]/lim) AND<br>[humans]/lim                    | <b>702561</b>  | <b>#4</b>        | #1 AND #2 AND #3                                                                                                                                                                     | <b>421</b>     |
| <b>#5</b> | #1 AND #2 AND #3 AND #4                                                                                                                                                                                                                | <b>119</b>    | <b>#5</b> | #1 AND #2 AND #3 AND #4                                                                                                                                               | <b>227</b>     |                  |                                                                                                                                                                                      |                |

**Table 2 of the supplementary data.** Reasons for exclusion after full-text assessment

| Acronym                        | Year published | Study title                                                                                                                                                                                       | Reason for exclusion                                     |
|--------------------------------|----------------|---------------------------------------------------------------------------------------------------------------------------------------------------------------------------------------------------|----------------------------------------------------------|
| DEFINE-HF <sup>1</sup>         | 2019           | Dapagliflozin Effects on Biomarkers, Symptoms, and Functional Status in Patients With Heart Failure With Reduced Ejection Fraction: the DEFINE-HF Trial                                           | Clinical endpoints were not stratified according to eGFR |
| CANA-HF <sup>2</sup>           | 2020           | The effects of canagliflozin compared to sitagliptin on cardiorespiratory fitness in type 2 diabetes mellitus and heart failure with reduced ejection fraction: the CANA-HF study                 | Compared against other glucose lower agents              |
| EMPA-RESPONSE-AHF <sup>3</sup> | 2020           | Randomized, double-blind, placebo-controlled, multicentre pilot study on the effects of empagliflozin on clinical outcomes in patients with acute decompensated heart failure (EMPA-RESPONSE-AHF) | Clinical endpoints were not stratified according to eGFR |
| Boer et al. <sup>4</sup>       | 2020           | Effects of the dual sodium-glucose linked transporter inhibitor, licogliflozin vs placebo or empagliflozin in patients with type 2 diabetes and heart failure                                     | Clinical endpoints were not stratified according to eGFR |
| EMPA <sup>5</sup>              | 2020           | Empagliflozin in Heart Failure: Diuretic and Cardiorenal Effects                                                                                                                                  | Did not report clinical endpoints                        |
| Empire HF <sup>6</sup>         | 2020           | Twelve weeks of treatment with empagliflozin in patients with heart failure and reduced ejection fraction: A double-blinded, randomized, and placebo-controlled trial                             | Clinical endpoints were not stratified according to eGFR |
| RECEDE-CHF <sup>7</sup>        | 2020           | Renal and Cardiovascular Effects of SGLT2 Inhibition in Combination With Loop Diuretics in Patients With Type 2 Diabetes and Chronic Heart Failure: The RECEDE-CHF Trial                          | Clinical endpoints were not stratified according to eGFR |
| Omar et al. <sup>8</sup>       | 2020           | Effect of Empagliflozin on Hemodynamics in Patients With Heart Failure and Reduced Ejection Fraction                                                                                              | Clinical endpoints were not stratified according to eGFR |
| REFORM <sup>9</sup>            | 2020           | Dapagliflozin Versus Placebo on Left Ventricular Remodeling in Patients With Diabetes and Heart Failure: The REFORM Trial                                                                         | Clinical endpoints were not stratified according to eGFR |

|                                  |      |                                                                                                                                                                                                                                                                |                                                                          |
|----------------------------------|------|----------------------------------------------------------------------------------------------------------------------------------------------------------------------------------------------------------------------------------------------------------------|--------------------------------------------------------------------------|
| CANDLE <sup>10</sup>             | 2020 | Effects of canagliflozin in patients with type 2 diabetes and chronic heart failure: a randomized trial (CANDLE)                                                                                                                                               | Compared against other glucose lower agents                              |
| EMPERIAL <sup>11</sup>           | 2021 | Effect of empagliflozin on exercise ability and symptoms in heart failure patients with reduced and preserved ejection fraction, with and without type 2 diabetes                                                                                              | Clinical endpoints were not stratified according to eGFR                 |
| SOLOIST-WHF <sup>12</sup>        | 2021 | Sotagliflozin in Patients with Diabetes and Recent Worsening Heart Failure                                                                                                                                                                                     | Did not report specific event numbers                                    |
| Empire HF Renal <sup>13</sup>    | 2021 | Effects of empagliflozin on estimated extracellular volume, estimated plasma volume, and measured glomerular filtration rate in patients with heart failure (Empire HF Renal): a prespecified substudy of a double-blind, randomised, placebo-controlled trial | Clinical endpoints were not stratified according to eGFR                 |
| SUGAR-DM-HF <sup>14</sup>        | 2021 | Effect of Empagliflozin on Left Ventricular Volumes in Patients With Type 2 Diabetes, or Prediabetes, and Heart Failure With Reduced Ejection Fraction (SUGAR-DM-HF)                                                                                           | Clinical endpoints were not stratified according to eGFR                 |
| EMBRACE-HF <sup>15</sup>         | 2021 | Empagliflozin Effects on Pulmonary Artery Pressure in Patients With Heart Failure: Results From the EMBRACE-HF Trial                                                                                                                                           | Clinical endpoints were not stratified according to eGFR                 |
| PRESERVED-HF <sup>16</sup>       | 2021 | The SGLT2 inhibitor dapagliflozin in heart failure with preserved ejection fraction: a multicenter randomized trial                                                                                                                                            | Clinical endpoints were not stratified according to eGFR                 |
| Ovchinnikov et al. <sup>17</sup> | 2021 | Effects of empagliflozin on exercise tolerance and left ventricular diastolic function in patients with heart failure with preserved ejection fraction and type 2 diabetes: a prospective single-center study                                                  | Not in English; Clinical endpoints were not stratified according to eGFR |
| Pietschner et al. <sup>18</sup>  | 2021 | Effect of empagliflozin on ketone bodies in patients with stable chronic heart failure                                                                                                                                                                         | Did not report clinical endpoints                                        |
| EMPA-TROPISM <sup>19</sup>       | 2021 | Randomized Trial of Empagliflozin in Nondiabetic Patients With Heart Failure and Reduced Ejection Fraction                                                                                                                                                     | Did not report clinical endpoints                                        |
| Tamaki et al. <sup>20</sup>      | 2021 | Effect of Empagliflozin as an Add-On Therapy on Decongestion and Renal Function in Patients With Diabetes Hospitalized for Acute                                                                                                                               | Did not report clinical endpoints                                        |

|                              |      |                                                                                                                                                                                                         |                                                          |
|------------------------------|------|---------------------------------------------------------------------------------------------------------------------------------------------------------------------------------------------------------|----------------------------------------------------------|
|                              |      | Decompensated Heart Failure: A Prospective Randomized Controlled Study                                                                                                                                  |                                                          |
| Charaya et al. <sup>21</sup> | 2022 | Impact of dapagliflozin treatment on renal function and diuretics use in acute heart failure: a pilot study                                                                                             | Clinical endpoints were not stratified according to eGFR |
| Hao et al. <sup>22</sup>     | 2022 | Different Doses of Empagliflozin in Patients with Heart Failure with Reduced Ejection Fraction                                                                                                          | Compared different dosage of SGLT2 inhibitor             |
| DAPA-VO2 <sup>23</sup>       | 2022 | Short-term Effects of Dapagliflozin on Maximal Functional Capacity in Heart Failure with Reduced Ejection Fraction (DAPA-VO2): a Randomized Clinical Trial                                              | Did not report clinical endpoints                        |
| Reis et al. <sup>24</sup>    | 2022 | Dapagliflozin Impact on the Exercise Capacity of Non-Diabetic Heart Failure with Reduced Ejection Fraction Patients                                                                                     | Clinical endpoints were not stratified according to eGFR |
| EMPAG-HF <sup>25</sup>       | 2022 | Effects of Early Empagliflozin Initiation on Diuresis and Kidney Function in Patients With Acute Decompensated Heart Failure (EMPAG-HF)                                                                 | Clinical endpoints were not stratified according to eGFR |
| CHIEF-HF <sup>26</sup>       | 2022 | The SGLT2 inhibitor canagliflozin in heart failure: the CHIEF-HF remote, patient-centered randomized trial                                                                                              | Clinical endpoints were not stratified according to eGFR |
| Thiele et al. <sup>27</sup>  | 2022 | Empagliflozin reduces markers of acute kidney injury in patients with acute decompensated heart failure                                                                                                 | Did not report clinical endpoints                        |
| EXCEED <sup>28</sup>         | 2022 | Effects of ipragliflozin on left ventricular diastolic function in patients with type 2 diabetes and heart failure with preserved ejection fraction: The EXCEED randomized controlled multicenter study | Did not report clinical endpoints                        |
| CAMEO-DAPA <sup>29</sup>     | 2023 | Cardiac and Metabolic Effects of Dapagliflozin in Heart Failure With Preserved Ejection Fraction: The CAMEO-DAPA Trial                                                                                  | Clinical endpoints were not stratified according to eGFR |
| Charaya et al. <sup>30</sup> | 2023 | Impact of Dapagliflozin Treatment on Serum Sodium Concentrations in Acute Heart Failure                                                                                                                 | Did not report clinical endpoints                        |
| Charaya et al. <sup>31</sup> | 2023 | The use of Dapagliflozin in Acute Decompensated Heart Failure: Results of the Randomized Study                                                                                                          | Not in English                                           |

|                                   |      |                                                                                                                                                                                                                  |                                                          |
|-----------------------------------|------|------------------------------------------------------------------------------------------------------------------------------------------------------------------------------------------------------------------|----------------------------------------------------------|
| DAPA-RESPONSE-AHF <sup>32</sup>   | 2023 | The clinical outcomes of dapagliflozin in patients with acute heart failure: A randomized controlled trial (DAPA-RESPONSE-AHF)                                                                                   | Clinical endpoints were not stratified according to eGFR |
| Golubovskaya et al. <sup>33</sup> | 2023 | Clinical Efficacy and Safety of Empagliflozin in Patients with Acute Heart Failure from the First Day of Hospitalization                                                                                         | Not in English                                           |
| EMPA-VISION <sup>34</sup>         | 2023 | Assessment of Cardiac Energy Metabolism, Function, and Physiology in Patients With Heart Failure Taking Empagliflozin: The Randomized, Controlled EMPA-VISION Trial                                              | Did not report clinical endpoints                        |
| Kolwelter et al. <sup>35</sup>    | 2023 | The SGLT2 inhibitor empagliflozin reduces tissue sodium content in patients with chronic heart failure: results from a placebo-controlled randomised trial                                                       | Did not report clinical endpoints                        |
| Mustapic et al. <sup>36</sup>     | 2023 | Impact of SGLT2 Inhibitor Therapy on Right Ventricular Function in Patients with Heart Failure and Reduced Ejection Fraction                                                                                     | Did not report clinical endpoints                        |
| DAPPER <sup>37</sup>              | 2023 | DAPagliflozin for the attenuation of albuminuria in Patients with hEaRt failure and type 2 diabetes (DAPPER study): a multicentre, randomised, open-label, parallel-group, standard treatment-controlled trial   | Clinical endpoints were not stratified according to eGFR |
| EmDia <sup>38</sup>               | 2023 | Effects of empagliflozin on left ventricular diastolic function in addition to usual care in individuals with type 2 diabetes mellitus—results from the randomized, double-blind, placebo-controlled EmDia trial | Did not report clinical endpoints                        |
| Afshani et al. <sup>39</sup>      | 2024 | Effect of empagliflozin on left ventricular volumes in type 2 diabetes or prediabetes heart failure patients with reduced ejection fraction                                                                      | Clinical endpoints were not stratified according to eGFR |
| Asif et al. <sup>40</sup>         | 2024 | Effectiveness of Dapagliflozin in Reducing Incidence of Worsening Heart Failure Events among patients with Reduced Ejection Fraction                                                                             | Clinical endpoints were not stratified according to eGFR |
| DICTATE-AHF <sup>41</sup>         | 2024 | Efficacy and Safety of Dapagliflozin in Patients With Acute Heart Failure                                                                                                                                        | Clinical endpoints were not stratified according to eGFR |
| Gilani et al. <sup>42</sup>       | 2024 | Early initiation of Dapagliflozin and its effect on health related quality of life in acute heart failure: a randomised controlled trial                                                                         | Did not report clinical endpoints                        |

|                             |      |                                                                                                                                                                                                     |                                                          |
|-----------------------------|------|-----------------------------------------------------------------------------------------------------------------------------------------------------------------------------------------------------|----------------------------------------------------------|
| EFFORT <sup>43</sup>        | 2024 | Ertugliflozin for Functional Mitral Regurgitation Associated With Heart Failure: EFFORT Trial                                                                                                       | Did not report clinical endpoints                        |
| DAPA-Shuttle1 <sup>44</sup> | 2024 | Water Conservation Overrides Osmotic Diuresis During SGLT2 Inhibition in Patients With Heart Failure                                                                                                | Did not report clinical endpoints                        |
| DETERMINE <sup>45</sup>     | 2024 | Effect of Dapagliflozin Versus Placebo on Symptoms and 6-Minute Walk Distance in Patients With Heart Failure: The DETERMINE Randomized Clinical Trials                                              | Clinical endpoints were not stratified according to eGFR |
| DAHOS <sup>46</sup>         | 2024 | DAHOS Study: Efficacy of dapagliflozin in treating heart failure with reduced ejection fraction and obstructive sleep apnea syndrome - A 3-month, multicenter, randomized controlled clinical trial | Did not report clinical endpoints                        |

eGFR, estimated glomerular filtration rate.

**Table 3 of the supplementary data.** Definitions of heart failure events, composite kidney outcome, and early decrease in estimated glomerular filtration rate

| Heart failure events                                   |                                                                                                                                                                                                                                                                                                                                                                                                                                 |
|--------------------------------------------------------|---------------------------------------------------------------------------------------------------------------------------------------------------------------------------------------------------------------------------------------------------------------------------------------------------------------------------------------------------------------------------------------------------------------------------------|
| <i>Trial</i>                                           |                                                                                                                                                                                                                                                                                                                                                                                                                                 |
| DAPA-HF <sup>47</sup>                                  | Heart failure hospitalization or urgent visit for heart failure requiring intravenous therapy                                                                                                                                                                                                                                                                                                                                   |
| EMPEROR- Reduced <sup>48</sup>                         | Heart failure hospitalization                                                                                                                                                                                                                                                                                                                                                                                                   |
| EMPEROR- Preserved <sup>49</sup>                       | Heart failure hospitalization                                                                                                                                                                                                                                                                                                                                                                                                   |
| EMPULSE <sup>50</sup>                                  | HF events included heart failure hospitalizations, urgent heart failure visits and unplanned outpatient heart failure visits. An event was considered a HF events only if worsening signs and symptoms of heart failure were present and an intensification of therapy (defined as an increase of oral or i.v. diuretics, augmentation of a vasoactive agent, or starting a mechanical or surgical intervention) was performed. |
| DELIVER <sup>51</sup>                                  | Heart failure hospitalization or urgent heart failure visit                                                                                                                                                                                                                                                                                                                                                                     |
| Composite kidney outcomes                              |                                                                                                                                                                                                                                                                                                                                                                                                                                 |
| <i>Trial</i>                                           | <i>Definition</i>                                                                                                                                                                                                                                                                                                                                                                                                               |
| DAPA-HF <sup>47</sup>                                  | A composite of $\geq 50\%$ sustained decline eGFR or end-stage renal disease or renal death.                                                                                                                                                                                                                                                                                                                                    |
| EMPEROR-Reduced <sup>48</sup>                          | First occurrence of chronic dialysis, kidney transplant, sustained reduction of $\geq 40\%$ eGFR, or sustained eGFR $< 15$ mL/min/1.73 m <sup>2</sup> if eGFR was $> 30$ mL/min/1.73 m <sup>2</sup> or $< 10$ mL/min/1.73 m <sup>2</sup> for patients with baseline eGFR $\leq 30$ mL/min/1.73 m <sup>2</sup>                                                                                                                   |
| EMPEROR-Preserved <sup>49</sup>                        | First occurrence of chronic dialysis, kidney transplant, sustained reduction of $\geq 40\%$ eGFR or sustained eGFR $< 15$ mL/min/1.73 m <sup>2</sup> if baseline eGFR was $> 30$ mL/min/1.73 m <sup>2</sup> or $< 10$ mL/min/1.73 m <sup>2</sup> for patients with baseline eGFR $< 30$ mL/min/1.73 m <sup>2</sup> .                                                                                                            |
| EMPULSE <sup>50</sup>                                  | -                                                                                                                                                                                                                                                                                                                                                                                                                               |
| DELIVER <sup>52</sup>                                  | First occurrence of (a) sustained 50% or greater decline in eGFR relative to baseline; (b) development of end-stage kidney disease (from adverse event reporting or sustained decline in eGFR to $< 15$ mL/min/1.73 m <sup>2</sup> ); or (c) death due to kidney causes.                                                                                                                                                        |
| Early decrease in estimated glomerular filtration rate |                                                                                                                                                                                                                                                                                                                                                                                                                                 |
| <i>Trial</i>                                           | <i>Definition</i>                                                                                                                                                                                                                                                                                                                                                                                                               |
| DAPA-HF <sup>53</sup>                                  | $> 10\%$ decrease in eGFR at 14 d                                                                                                                                                                                                                                                                                                                                                                                               |

|                                 |                                |
|---------------------------------|--------------------------------|
| EMPEROR-Reduced <sup>54</sup>   | >20% decrease in eGFR at 4 wk  |
| EMPEROR-Preserved <sup>55</sup> | >8.8% decrease in eGFR at 4 wk |
| EMPULSE <sup>50</sup>           | -                              |
| DELIVER <sup>52</sup>           | >10% decrease in eGFR at 1 mo  |

eGFR, estimated glomerular filtration rate.



**Table 4 of the supplementary data.** Definitions of adverse events

|                               | DAPA-HF <sup>47</sup>                                                                                                                                                                                                                                                                                                                                                                                                                                                                                                                                                                                                            | EMPEROR-Reduced <sup>48</sup>                                                                                                                                                                                                                                                                                                                                                                                                                                                                                                                                                                                                                                                                                                                                                                                                                 | EMPEROR-Preserved <sup>49</sup>                                                                                                                                                                                                                                                                                                                                                                                                                                                                                                                                                                                                                                                                                                                         | EMPULSE <sup>50</sup>                                                                                                                                                                                                                                                                                                                                                                                                                                                                                | DELIVER <sup>51</sup>                                                                                                                                                                                                                                                                                                                                                                                                                                                    |
|-------------------------------|----------------------------------------------------------------------------------------------------------------------------------------------------------------------------------------------------------------------------------------------------------------------------------------------------------------------------------------------------------------------------------------------------------------------------------------------------------------------------------------------------------------------------------------------------------------------------------------------------------------------------------|-----------------------------------------------------------------------------------------------------------------------------------------------------------------------------------------------------------------------------------------------------------------------------------------------------------------------------------------------------------------------------------------------------------------------------------------------------------------------------------------------------------------------------------------------------------------------------------------------------------------------------------------------------------------------------------------------------------------------------------------------------------------------------------------------------------------------------------------------|---------------------------------------------------------------------------------------------------------------------------------------------------------------------------------------------------------------------------------------------------------------------------------------------------------------------------------------------------------------------------------------------------------------------------------------------------------------------------------------------------------------------------------------------------------------------------------------------------------------------------------------------------------------------------------------------------------------------------------------------------------|------------------------------------------------------------------------------------------------------------------------------------------------------------------------------------------------------------------------------------------------------------------------------------------------------------------------------------------------------------------------------------------------------------------------------------------------------------------------------------------------------|--------------------------------------------------------------------------------------------------------------------------------------------------------------------------------------------------------------------------------------------------------------------------------------------------------------------------------------------------------------------------------------------------------------------------------------------------------------------------|
| <i>Serious adverse events</i> | <p>An adverse event that fulfils one or more of the following criteria:</p> <ul style="list-style-type: none"> <li>- Results in death</li> <li>- Is immediately life-threatening</li> <li>- Requires in-patient hospitalization or prolongation of existing hospitalization</li> <li>- Results in persistent or significant disability/incapacity or substantial disruption of the ability to conduct normal life functions</li> <li>- Is a congenital abnormality or birth defect</li> <li>- Is an important medical event that may jeopardize the patient or may require medical intervention to prevent one of the</li> </ul> | <p>Any adverse events which:</p> <ul style="list-style-type: none"> <li>- Results in death</li> <li>- Is life-threatening, this refers to an event in which the patient was at risk of death at the time of the event; it does not refer to an event that hypothetically might have caused death if more severe</li> <li>- Requires inpatient hospitalization or prolongation of existing hospitalization</li> <li>- Results in persistent or significant disability or incapacity</li> <li>- Is a congenital anomaly/birth defect</li> <li>- Is to be deemed serious for any other reason if it is an important medical event when based upon appropriate medical judgment which may jeopardize the patient and may require medical or surgical intervention to prevent one of the other outcomes listed in the above definitions</li> </ul> | <p>Any adverse events that which:</p> <ul style="list-style-type: none"> <li>- Results in death</li> <li>- Is life-threatening, this refers to an event in which the patient was at risk of death at the time of the event; it does not refer to an event that hypothetically might have caused death if more severe</li> <li>- Requires inpatient hospitalization or prolongation of existing hospitalization</li> <li>- Results in persistent or significant disability or incapacity</li> <li>- Is a congenital anomaly/birth defect</li> <li>- Is to be deemed serious for any other reason if it is an important medical event when based upon appropriate medical judgment which may jeopardize the patient and may require medical or</li> </ul> | <p>Any adverse event fulfils at least one of the following criteria:</p> <ul style="list-style-type: none"> <li>- results in death,</li> <li>- is life-threatening, which refers to an event in which the patient was at risk of death at the time of the event; it does not refer to an event that hypothetically might have caused death if more severe,</li> <li>- requires inpatient hospitalization or prolongation of existing hospitalization,</li> <li>- results in persistent or</li> </ul> | <p>An adverse event that fulfils one or more of the following criteria:</p> <ul style="list-style-type: none"> <li>- Results in death</li> <li>- Is immediately life-threatening</li> <li>- Requires in-subject hospitalization or prolongation of existing hospitalization</li> <li>- Results in persistent or significant disability or incapacity</li> <li>- Is a congenital abnormality or birth defect</li> <li>- Is an important medical event that may</li> </ul> |

|  |                       |  |                                                                                                                                                                                                                                                                                                                                                                                                                                                                                                                                                                                                                    |                                                                                                      |
|--|-----------------------|--|--------------------------------------------------------------------------------------------------------------------------------------------------------------------------------------------------------------------------------------------------------------------------------------------------------------------------------------------------------------------------------------------------------------------------------------------------------------------------------------------------------------------------------------------------------------------------------------------------------------------|------------------------------------------------------------------------------------------------------|
|  | outcomes listed above |  | <p>surgical intervention to prevent one of the other outcomes listed in the above definitions</p> <ul style="list-style-type: none"> <li>- significant disability or incapacity,</li> <li>- is a congenital anomaly / birth defect,</li> <li>- is deemed serious for any other reason if it is an important medical event when based on appropriate medical judgment which may jeopardize the patient and may require medical or surgical intervention to prevent one of the other outcomes listed in the above definitions. Examples of such events are intensive treatment in an emergency room or at</li> </ul> | jeopardize the subject or may require medical treatment to prevent one of the outcomes listed above. |
|--|-----------------------|--|--------------------------------------------------------------------------------------------------------------------------------------------------------------------------------------------------------------------------------------------------------------------------------------------------------------------------------------------------------------------------------------------------------------------------------------------------------------------------------------------------------------------------------------------------------------------------------------------------------------------|------------------------------------------------------------------------------------------------------|

|                                |                                                                                                                                      |                                                                     |                                                                     |                                                                                                                                              |                                                                                                                                   |
|--------------------------------|--------------------------------------------------------------------------------------------------------------------------------------|---------------------------------------------------------------------|---------------------------------------------------------------------|----------------------------------------------------------------------------------------------------------------------------------------------|-----------------------------------------------------------------------------------------------------------------------------------|
|                                |                                                                                                                                      |                                                                     |                                                                     | home for allergic bronchospasm, blood dyscrasias or convulsions that do not result in hospitalization or development of dependency or abuse. |                                                                                                                                   |
| <i>Discontinuation</i>         | -                                                                                                                                    | -                                                                   | -                                                                   |                                                                                                                                              | -                                                                                                                                 |
| <i>Volume depletion</i>        | eg, dehydration, hypovolemia, or hypotension                                                                                         | -                                                                   | -                                                                   |                                                                                                                                              | -                                                                                                                                 |
| <i>Urinary tract infection</i> | -                                                                                                                                    | -                                                                   | -                                                                   |                                                                                                                                              | -                                                                                                                                 |
| <i>Genital infection</i>       | -                                                                                                                                    | -                                                                   | -                                                                   |                                                                                                                                              | -                                                                                                                                 |
| <i>Hypoglycemia</i>            | An event that requires assistance of another person to actively administer carbohydrates, glucagon, or take other corrective actions | Plasma glucose value of $\leq 70$ mg/dL or that required assistance | Plasma glucose value of $\leq 70$ mg/dL or that required assistance |                                                                                                                                              | A major hypoglycemic event is defined as an event that is characterized by altered mental and/or physical status, any symptoms of |

|                      |   |   |   |  |                                                                                                                                                                                                                                  |
|----------------------|---|---|---|--|----------------------------------------------------------------------------------------------------------------------------------------------------------------------------------------------------------------------------------|
|                      |   |   |   |  | severe impairment in consciousness or behavior, that require external assistance of another person for treatment of hypoglycemia and recovery, to actively administer carbohydrates, glucagon, or take other corrective actions. |
| <i>Bone fracture</i> | - | - | - |  | -                                                                                                                                                                                                                                |

**Table 5 of the supplementary data.** Baseline characteristics of patients by chronic kidney disease status at baseline

|                                                             | DAPA-HF <sup>56</sup>  | EMPEROR-Reduced <sup>57</sup> | EMPEROR-Preserved <sup>58</sup> | EMPULSE <sup>59</sup>      | DELIVER <sup>60</sup>     |
|-------------------------------------------------------------|------------------------|-------------------------------|---------------------------------|----------------------------|---------------------------|
| <i>Mean age, y</i>                                          | 70.9/63.2              | 70.2/63.0                     | 74.2/69.2                       | 72.3/62.2                  | 74.5/69.0                 |
| <i>Male sex, %</i>                                          | 72.3/79.6              | 74.5/77.8                     | 51.4/59.7                       | 61.4/73.7                  | 50.7/61.0                 |
| <i>NYHA functional class, %</i>                             |                        |                               |                                 |                            |                           |
| III-IV                                                      | 34.2/31.3              | 27.1/22.4                     | 21.8/14.3                       | 63.1/60.3                  | 28.1/21.5                 |
| IV                                                          | 0.7/1.0                | 0.7/0.4                       | 0.4/0.1                         | 9.1/10.8                   | 0.5/0.2                   |
| <i>Hypertension, %</i>                                      | 81.0/69.6              | 78.0/66.0                     | 92.6/88.3                       | 85.3/71.1                  | 91.4/86.0                 |
| <i>Diabetes mellitus, %</i>                                 | 51.0/41.1              | 53.9/45.0                     | 52.3/45.3                       | 49.7/37.6                  | 49.6/41.0                 |
| <i>Primary ischemic cardiomyopathy, %</i>                   | 61.0/53.2              | 54.4/48.7                     | -                               | -                          | -                         |
| <i>History of previous heart failure hospitalization, %</i> | 49.4/46.1              | 31.2/30.5                     | 24.9/20.5                       | 100/100                    | 44.3/37.0                 |
| <i>Mean LVEF, %</i>                                         | 31.3/30.9              | 27.7/27.1                     | 54.9/53.7                       | -                          | 54.5/54.0                 |
| <i>Median NT-pro-BNP, pg/mL</i>                             | 1823.8/1261.1          | 2334.0/1526.4                 | 1789.0/1085.0 <sup>a</sup>      | 4121.0/2378.0 <sup>+</sup> | 1237.0/889.0 <sup>b</sup> |
| <i>Mean eGFR, mL/min/1.73 m<sup>2</sup></i>                 | 47.0/78.7              | 47.0/79.0                     | 46.3/77.1                       | -                          | 44.6/77.0                 |
| <i>Medical therapy</i>                                      |                        |                               |                                 |                            |                           |
| ACE inhibitor, %                                            | 80.1/85.5 <sup>c</sup> | 41.2/50.8                     | 37.3/43.6                       | 28.8/39.7                  | 70.6/74.0 <sup>c</sup>    |
| ARB, %                                                      | 80.1/85.5 <sup>c</sup> | 25.6/23.0                     | 40.1/37.1                       | 25.5/16.5                  | 70.6/74.0 <sup>c</sup>    |
| ARNI, %                                                     | 11.5/10.2              | 20.1/18.8                     | 2.1/2.3                         | 11.8/22.2                  | 5.0/5.0                   |
| Beta-blocker, %                                             | 95.4/96.5              | 94.8/94.8                     | 85.9/86.7                       | 79.7/78.9                  | 81.1/84.0                 |

|                       |           |           |           |           |           |
|-----------------------|-----------|-----------|-----------|-----------|-----------|
| MRA, %                | 67.3/73.7 | 67.9/75.2 | 38.2/36.6 | 46.4/61.9 | 41.2/44.0 |
| <i>Device therapy</i> |           |           |           |           |           |
| ICD, %                | 29.5/23.9 | 35.7/26.6 | 3.9/3.4   | -         | -         |
| CRT, %                | 9.7/6.0   | 16.0/7.1  | -         | -         | -         |

ACE, angiotensin converting-enzyme; ARB, angiotensin receptor blockers; ARNI, angiotensin receptor neprilysin inhibitor; CRT, cardiac resynchronisation

therapy; eGFR, estimated glomerular filtration rate; ICD, implantable cardioverter defibrillator; LVEF, left ventricular ejection fraction; MRA, mineralocorticoid

receptor antagonist; NT-proBNP, N-terminal prohormone of B-type natriuretic peptide; NYHA, New York Heart Association.

Data are presented as chronic kidney disease/nonchronic kidney disease groups.

<sup>a</sup>Reported as the mean, not the median.

<sup>b</sup>For patients with chronic kidney disease, eGFR was calculated using the weighted median for 2 subgroups: those with eGFR < 45 mL/min/1.73 m<sup>2</sup> and those with eGFR between 45 and 60 mL/min/1.73 m<sup>2</sup>.

<sup>c</sup>Either ACE inhibitors or ARB.

**Figure 1 of the supplementary data.** Risk of bias of individual trials by the Cochrane Risk Assessment Tool

|                   | D1                                                                                | D2                                                                                | D3                                                                                 | D4                                                                                  | D5                                                                                  | Overall                                                                             |
|-------------------|-----------------------------------------------------------------------------------|-----------------------------------------------------------------------------------|------------------------------------------------------------------------------------|-------------------------------------------------------------------------------------|-------------------------------------------------------------------------------------|-------------------------------------------------------------------------------------|
| DAPA-HF           |  |  |  |  |  |  |
| EMPEROR-Reduced   |  |  |  |  |  |  |
| EMPEROR-Preserved |  |  |  |  |  |  |
| EMPULSE           |  |  |  |  |  |  |
| DELIVER           |  |  |  |  |  |  |

**Judgement**

-  Low risk of bias
-  High risk of bias
-  Uncertain risk of bias

**Domains**

- D1: Randomization process
- D2: Deviations from intended interventions
- D3: Missing outcome data
- D4: Measurement of outcomes
- D5: Selection of reported results

## REFERENCES OF THE SUPPLEMENTARY DATA

1. Nassif ME, Windsor SL, Tang F, et al. Dapagliflozin Effects on Biomarkers, Symptoms, and Functional Status in Patients With Heart Failure With Reduced Ejection Fraction: the DEFINE-HF Trial. *Circulation*. 2019;140:1463-1476.
2. Carbone S, Billingsley HE, Canada JM, et al. The effects of canagliflozin compared to sitagliptin on cardiorespiratory fitness in type 2 diabetes mellitus and heart failure with reduced ejection fraction: the CANA-HF study. *Diabetes/metabolism research and reviews*. 2020;36:e3335.
3. Damman K, Beusekamp JC, Boorsma EM, et al. Randomized, double-blind, placebo-controlled, multicentre pilot study on the effects of empagliflozin on clinical outcomes in patients with acute decompensated heart failure (EMPA-RESPONSE-AHF). *Eur J Heart Fail*. 2020;22:713-722.
4. de Boer RA, Núñez J, Kozlovski P, Wang Y, Proot P, Keefe D. Effects of the dual sodium-glucose linked transporter inhibitor, licogliflozin vs placebo or empagliflozin in patients with type 2 diabetes and heart failure. *Br J Clin Pharmacol*. 2020;86:1346-1356.
5. Griffin M, Rao VS, Ivey-Miranda J, et al. Empagliflozin in Heart Failure: Diuretic and Cardiorenal Effects. *Circulation*. 2020;142:1028-1039.
6. Jensen J, Omar M, Kistorp C, et al. Twelve weeks of treatment with empagliflozin in patients with heart failure and reduced ejection fraction: A double-blinded, randomized, and placebo-controlled trial. *Am Heart J*. 2020;228:47-56.
7. Mordi NA, Mordi IR, Singh JS, McCrimmon RJ, Struthers AD, Lang CC. Renal and Cardiovascular Effects of SGLT2 Inhibition in Combination With Loop Diuretics in Patients With Type 2 Diabetes and Chronic Heart Failure: The RECEDE-CHF Trial. *Circulation*. 2020;142:1713-1724.
8. Omar M, Jensen J, Frederiksen PH, et al. Effect of Empagliflozin on Hemodynamics in Patients With Heart Failure and Reduced Ejection Fraction. *J Am Coll Cardiol*. 2020;76:2740-2751.
9. Singh JSS, Mordi IR, Vickneson K, et al. Dapagliflozin Versus Placebo on Left Ventricular Remodeling in Patients With Diabetes and Heart Failure: The REFORM Trial. *Diabetes Care*. 2020;43:1356-1359.



10. Tanaka A, Hisauchi I, Taguchi I, et al. Effects of canagliflozin in patients with type 2 diabetes and chronic heart failure: a randomized trial (CANDLE). *ESC Heart Fail.* 2020;7:1585-1594.
11. Abraham WT, Lindenfeld J, Ponikowski P, et al. Effect of empagliflozin on exercise ability and symptoms in heart failure patients with reduced and preserved ejection fraction, with and without type 2 diabetes. *Eur Heart J.* 2021;42:700-710.
12. Bhatt DL, Szarek M, Steg PG, et al. Sotagliflozin in Patients with Diabetes and Recent Worsening Heart Failure. *N Engl J Med.* 2021;384:117-128.
13. Jensen J, Omar M, Kistorp C, et al. Effects of empagliflozin on estimated extracellular volume, estimated plasma volume, and measured glomerular filtration rate in patients with heart failure (Empire HF Renal): a prespecified substudy of a double-blind, randomised, placebo-controlled trial. *Lancet Diab Endocr.* 2021;9:106-116.
14. Lee MMY, Brooksbank KJM, Wetherall K, et al. Effect of Empagliflozin on Left Ventricular Volumes in Patients With Type 2 Diabetes, or Prediabetes, and Heart Failure With Reduced Ejection Fraction (SUGAR-DM-HF). *Circulation.* 2021;143:516-525.
15. Nassif ME, Qintar M, Windsor SL, et al. Empagliflozin Effects on Pulmonary Artery Pressure in Patients With Heart Failure: Results From the EMBRACE-HF Trial. *Circulation.* 2021;143:1673-1686.
16. Nassif ME, Windsor SL, Borlaug BA, et al. The SGLT2 inhibitor dapagliflozin in heart failure with preserved ejection fraction: a multicenter randomized trial. *Nat Med.* 2021;27:1954-1960.
17. Ovchinnikov AG, Borisov AA, Zhrebchikova K, et al. Effects of empagliflozin on exercise tolerance and left ventricular diastolic function in patients with heart failure with preserved ejection fraction and type 2 diabetes: a prospective single-center study. *Russian J Cardiol.* 2021;26.
18. Pietschner R, Kolwelter J, Bosch A, et al. Effect of empagliflozin on ketone bodies in patients with stable chronic heart failure. *Cardiovasc Diabetol.* 2021;20:219.
19. Santos-Gallego CG, Vargas-Delgado AP, Requena-Ibanez JA, et al. Randomized Trial of Empagliflozin in Nondiabetic Patients With Heart Failure and Reduced Ejection Fraction. *J Am Coll Cardiol.* 2021;77:243-255.

20. Tamaki S, Yamada T, Watanabe T, et al. Effect of Empagliflozin as an Add-On Therapy on Decongestion and Renal Function in Patients With Diabetes Hospitalized for Acute Decompensated Heart Failure: A Prospective Randomized Controlled Study. *Circ Heart Fail*. 2021;14:e007048.
21. Charaya K, Shchekochikhin D, Andreev D, et al. Impact of dapagliflozin treatment on renal function and diuretics use in acute heart failure: a pilot study. *Open Heart*. 2022;9.
22. Hao Z, Zhang Y. Different Doses of Empagliflozin in Patients with Heart Failure with Reduced Ejection Fraction. *Int Heart J*. 2022;63:852-856.
23. Palau P, Amiguet M, Domínguez E, et al. Short-term Effects of Dapagliflozin on Maximal Functional Capacity in Heart Failure with Reduced Ejection Fraction (DAPA-VO2 ): a Randomized Clinical Trial. *Eur J Heart Fail*. 2022;24:1816-1826.
24. Reis J, Teixeira AR, Gonçalves AV, et al. Dapagliflozin Impact on the Exercise Capacity of Non-Diabetic Heart Failure with Reduced Ejection Fraction Patients. *J Clin Med*. 2022;11.
25. Schulze PC, Bogoviku J, Westphal J, et al. Effects of Early Empagliflozin Initiation on Diuresis and Kidney Function in Patients With Acute Decompensated Heart Failure (EMPAG-HF). *Circulation*. 2022;146:289-298.
26. Spertus JA, Birmingham MC, Nassif M, et al. The SGLT2 inhibitor canagliflozin in heart failure: the CHIEF-HF remote, patient-centered randomized trial. *Nat Med*. 2022;28:809-813.
27. Thiele K, Rau M, Hartmann NK, et al. Empagliflozin reduces markers of acute kidney injury in patients with acute decompensated heart failure. *ESC Heart Fail*. 2022;9:2233-2238.
28. Akasaka H, Sugimoto K, Shintani A, et al. Effects of ipragliflozin on left ventricular diastolic function in patients with type 2 diabetes and heart failure with preserved ejection fraction: The EXCEED randomized controlled multicenter study. *Geriatr Gerontol Int*. 2022;22:298-304.
29. Borlaug BA, Reddy YNV, Braun A, et al. Cardiac and Metabolic Effects of Dapagliflozin in Heart Failure With Preserved Ejection Fraction: The CAMEO-DAPA Trial. *Circulation*. 2023;148:834-844.
30. Charaya K, Shchekochikhin D, Agadzhanian A, et al. Impact of Dapagliflozin Treatment on Serum Sodium Concentrations in Acute Heart Failure. *Cardiorenal Med*. 2023;13:101-108.

31. Charaya KV, Schekochikhin DIY, Nikiforova TV, et al. The use of Dapagliflozin in Acute Decompensated Heart Failure: Results of the Randomized Study. *Kardiologiia*. 2023;63:11-18.
32. Emara AN, Wadie M, Mansour NO, Shams MEE. The clinical outcomes of dapagliflozin in patients with acute heart failure: A randomized controlled trial (DAPA-RESPONSE-AHF). *Eur J Pharmacol*. 2023;961:176179.
33. Golubovskaya DP, Karetnikova VN, Osokina AV, Oleinik IR, Barbarash OL. Clinical Efficacy and Safety of Empagliflozin in Patients with Acute Heart Failure from the First Day of Hospitalization. *Rational Pharmacotherapy in Cardiology*. 2023;19:126-133.
34. Hundertmark MJ, Adler A, Antoniadis C, et al. Assessment of Cardiac Energy Metabolism, Function, and Physiology in Patients With Heart Failure Taking Empagliflozin: The Randomized, Controlled EMPA-VISION Trial. *Circulation*. 2023;147:1654-1669.
35. Kolwelter J, Kannenkeril D, Linz P, et al. The SGLT2 inhibitor empagliflozin reduces tissue sodium content in patients with chronic heart failure: results from a placebo-controlled randomised trial. *Clinical Research in Cardiology*. 2023;112:134-144.
36. Mustapic I, Bakovic D, Susilovic Grabovac Z, Borovac JA. Impact of SGLT2 Inhibitor Therapy on Right Ventricular Function in Patients with Heart Failure and Reduced Ejection Fraction. *J Clin Med*. 2023;12.
37. Yoshihara F, Imazu M, Sakuma I, et al. DAPagliflozin for the attenuation of albuminuria in Patients with hEaRt failure and type 2 diabetes (DAPPER study): a multicentre, randomised, open-label, parallel-group, standard treatment-controlled trial. *EClinicalMedicine*. 2023;66:102334.
38. Prochaska JH, Jünger C, Schulz A, et al. Effects of empagliflozin on left ventricular diastolic function in addition to usual care in individuals with type 2 diabetes mellitus-results from the randomized, double-blind, placebo-controlled EmDia trial. *Clin Res Cardiol*. 2023;112:911-922.
39. Afshani MR, Torfi E, Akiash N, Jahanshahi A, Mohamadi A, Sherfat O. Effect of empagliflozin on left ventricular volumes in type 2 diabetes or prediabetes heart failure patients with reduced ejection fraction. *Acta Cardiologica*. 2024:796-802.

40. Asif M, Laique T. Effectiveness of Dapagliflozin in Reducing Incidence of Worsening Heart Failure Events among patients with Reduced Ejection Fraction. *Pakistan Journal of Medical and Health Sciences*. 2024;18:38-40.
41. Cox ZL, Collins SP, Hernandez GA, et al. Efficacy and Safety of Dapagliflozin in Patients With Acute Heart Failure. *J Am Coll Cardiol*. 2024;83:1295-1306.
42. Fatima Gilani SF, Ali S, Farhat K, Noor M, Siddiqui MB, Waqar F. Early initiation of Dapagliflozin and its effect on health related quality of life in acute heart failure: a randomised controlled trial. *JPMA. The Journal of the Pakistan Medical Association*. 2024;74:621-625.
43. Kang DH, Park SJ, Shin SH, et al. Ertugliflozin for Functional Mitral Regurgitation Associated With Heart Failure: EFFORT Trial. *Circulation*. 2024;149:1865-1874.
44. Marton A, Saffari SE, Rauh M, et al. Water Conservation Overrides Osmotic Diuresis During SGLT2 Inhibition in Patients With Heart Failure. *J Am Coll Cardiol*. 2024;83:1386-1398.
45. McMurray JJV, Docherty KF, de Boer RA, et al. Effect of Dapagliflozin Versus Placebo on Symptoms and 6-Minute Walk Distance in Patients With Heart Failure: The DETERMINE Randomized Clinical Trials. *Circulation*. 2024;149:825-838.
46. Xie L, Li S, Yu X, Wei Q, Yu F, Tong J. DAHOS Study: Efficacy of dapagliflozin in treating heart failure with reduced ejection fraction and obstructive sleep apnea syndrome - A 3-month, multicenter, randomized controlled clinical trial. *Eur J Clin Pharmacol*. 2024;80:771-780.
47. McMurray JJV, Solomon SD, Inzucchi SE, et al. Dapagliflozin in patients with heart failure and reduced ejection fraction. *N Engl J Med*. 2019;381:1995-2008.
48. Packer M, Anker SD, Butler J, et al. Cardiovascular and Renal Outcomes with Empagliflozin in Heart Failure. *N Engl J Med*. 2020;383:1413-1424.
49. Anker SD, Butler J, Filippatos G, et al. Empagliflozin in heart failure with a preserved ejection fraction. *N Engl J Med*. 2021;385:1451-1461.
50. Voors AA, Angermann CE, Teerlink JR, et al. The SGLT2 inhibitor empagliflozin in patients hospitalized for acute heart failure: a multinational randomized trial. *Nat Med*. 2022;28:568-574.

51. Solomon SD, McMurray JJV, Claggett B, et al. Dapagliflozin in Heart Failure with Mildly Reduced or Preserved Ejection Fraction. *N Engl J Med* 2022;387:1089-1098.
52. Mc Causland FR, Claggett BL, Vaduganathan M, et al. Decline in Estimated Glomerular Filtration Rate After Dapagliflozin in Heart Failure With Mildly Reduced or Preserved Ejection Fraction: A Prespecified Secondary Analysis of the DELIVER Randomized Clinical Trial. *JAMA Cardiol.* 2024;9:144-152.
53. Adamson C, Docherty KF, Heerspink HJL, et al. Initial Decline (Dip) in Estimated Glomerular Filtration Rate After Initiation of Dapagliflozin in Patients With Heart Failure and Reduced Ejection Fraction: Insights From DAPA-HF. *Circulation.* 2022;146:438-449.
54. Zannad F, Ferreira JP, Gregson J, et al. Early changes in estimated glomerular filtration rate post-initiation of empagliflozin in EMPEROR-Reduced. *Eur J Heart Fail.* 2022;24:1829-1839.
55. Rastogi T, Ferreira JP, Butler J, et al. Early changes in estimated glomerular filtration rate post-initiation of empagliflozin in EMPEROR-Preserved. *Eur J Heart Fail.* 2024;26:885-896.
56. Jhund PS, Solomon SD, Docherty KF, et al. Efficacy of Dapagliflozin on Renal Function and Outcomes in Patients with Heart Failure with Reduced Ejection Fraction: Results of DAPA-HF. *Circulation.* 2021;143:298-309.
57. Zannad F, Ferreira JP, Pocock SJ, et al. Cardiac and Kidney Benefits of Empagliflozin in Heart Failure Across the Spectrum of Kidney Function: insights From EMPEROR-Reduced. *Circulation.* 2021;143:310-321.
58. Sharma A, Ferreira JP, Zannad F, et al. Cardiac and kidney benefits of empagliflozin in heart failure across the spectrum of kidney function: Insights from the EMPEROR-Preserved trial. *Eur J Heart Fail.* 2023;25:1337-1348.
59. Voors AA, Damman K, Teerlink JR, et al. Renal effects of empagliflozin in patients hospitalized for acute heart failure: from the EMPULSE trial. *Eur J Heart Fail.* 2022;24:1844-1852.

60. Mc Causland FR, Claggett BL, Vaduganathan M, et al. Dapagliflozin and Kidney Outcomes in Patients With Heart Failure With Mildly Reduced or Preserved Ejection Fraction: A Prespecified Analysis of the DELIVER Randomized Clinical Trial. *JAMA Cardiol.* 2023;8:56-65.
